# Supplementary material
Source: PubMed Central journal article supplement (PMC6145788)

## Supplementary Online Content

Brady JS, Desai SV, Crippen MM, et al. Association of anesthesia duration with complications after microvascular reconstruction of the head and neck. *JAMA Facial Plast Surg*. Published online October 5, 2017. doi:10.1001/jamafacial.2017.1607

**eTable.** *Current Procedural Terminology Codes*

**eFigure.** Box Plot of Anesthesia Duration Quintiles

This supplementary material has been provided by the authors to give readers additional information about their work.

**eTable. Current Procedural Terminology Codes**

| <b>Variable</b>                                                                                           | <b>CPT Code</b> |
|-----------------------------------------------------------------------------------------------------------|-----------------|
| <b>Free Flap Reconstruction</b>                                                                           |                 |
| Free muscle or myocutaneous flap with microvascular anastomosis                                           | 15756           |
| Free skin flap with microvascular anastomosis                                                             | 15757           |
| Free fascial flap with microvascular anastomosis                                                          | 15758           |
| Free jejunum transfer with microvascular anastomosis                                                      | 43496           |
| Free omental flap with microvascular anastomosis                                                          | 49006           |
| Free omental flap with microvascular anastomosis                                                          | 49906           |
| Free osteocutaneous flap with microvascular anastomosis; other than iliac crest, metatarsal, or great toe | 20969           |
| Bone graft with microvascular anastomosis; fibula                                                         | 20955           |
| Bone graft with microvascular anastomosis; iliac crest                                                    | 20956           |
| Bone graft with microvascular anastomosis; metatarsal                                                     | 20957           |
| Bone graft other than fibula, iliac crest, or metatarsal                                                  | 20962           |
| Free osteocutaneous flap with microvascular (iliac crest)                                                 | 20970           |
| Free osteocutaneous flap with microvascular (metatarsal)                                                  | 20972           |
| Free osteocutaneous flap with microvascular (great toe)                                                   | 20973           |
| Partial esophagectomy, cervical, with free intestinal graft                                               | 43116           |
| Graft for facial nerve paralysis; free muscle graft by microvascular                                      | 15842           |

**eFigure.** Box Plot of Anesthesia Duration Quintiles

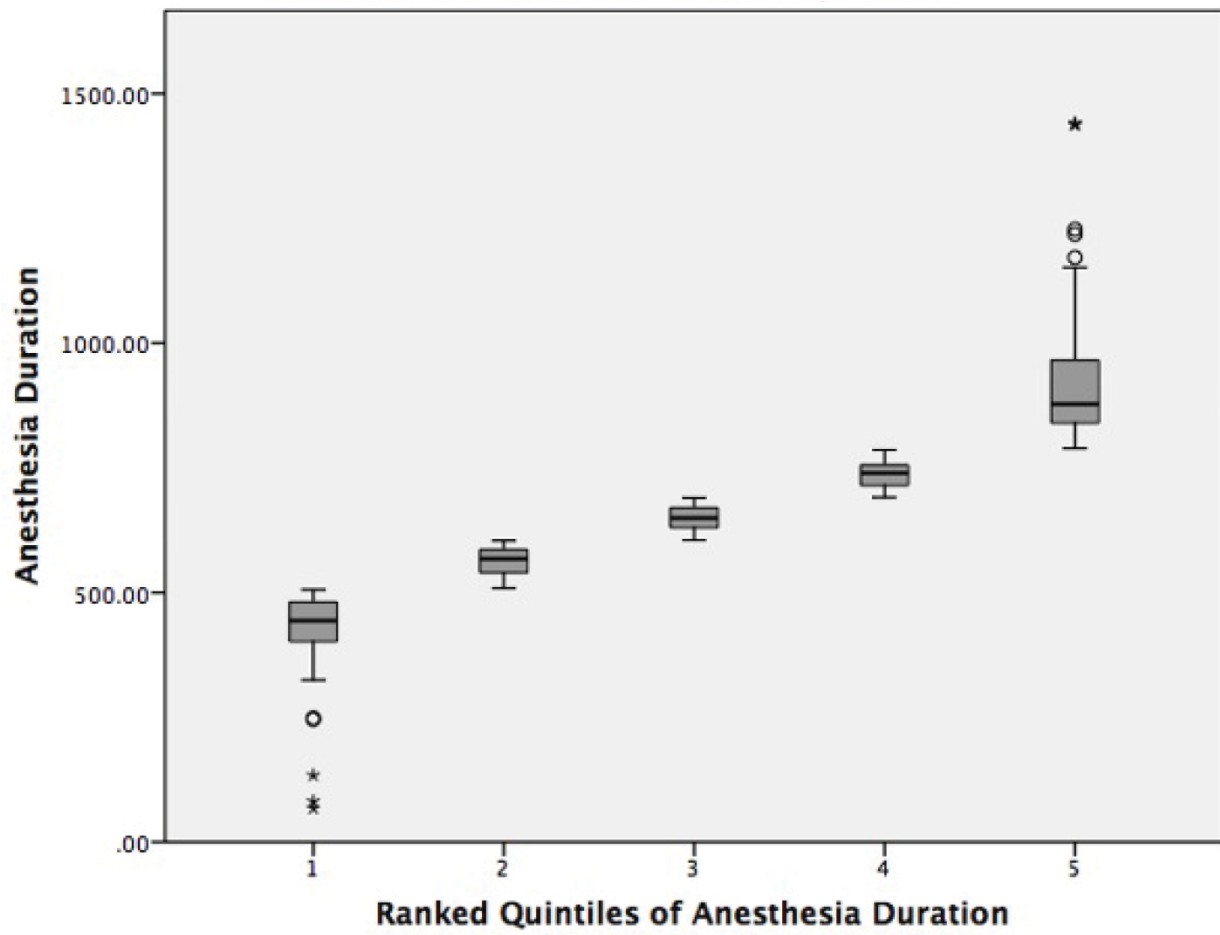

Supplement: jamafacialplastsurg-20-188-s001.pdf [file jamafacialplastsurg-20-188-s001.pdf]
